# Supplementary material for: A fjord dataset for multidisciplinary applications: Thirteen years of ocean observations in Sermilik Fjord, Southeast Greenland
Source: Copernicus journal article supplement (doi:10.5194/essd-2025-345), 2025-07-25
Supplement: Supplementary file 1 [file essd-2025-345-supplement.pdf]

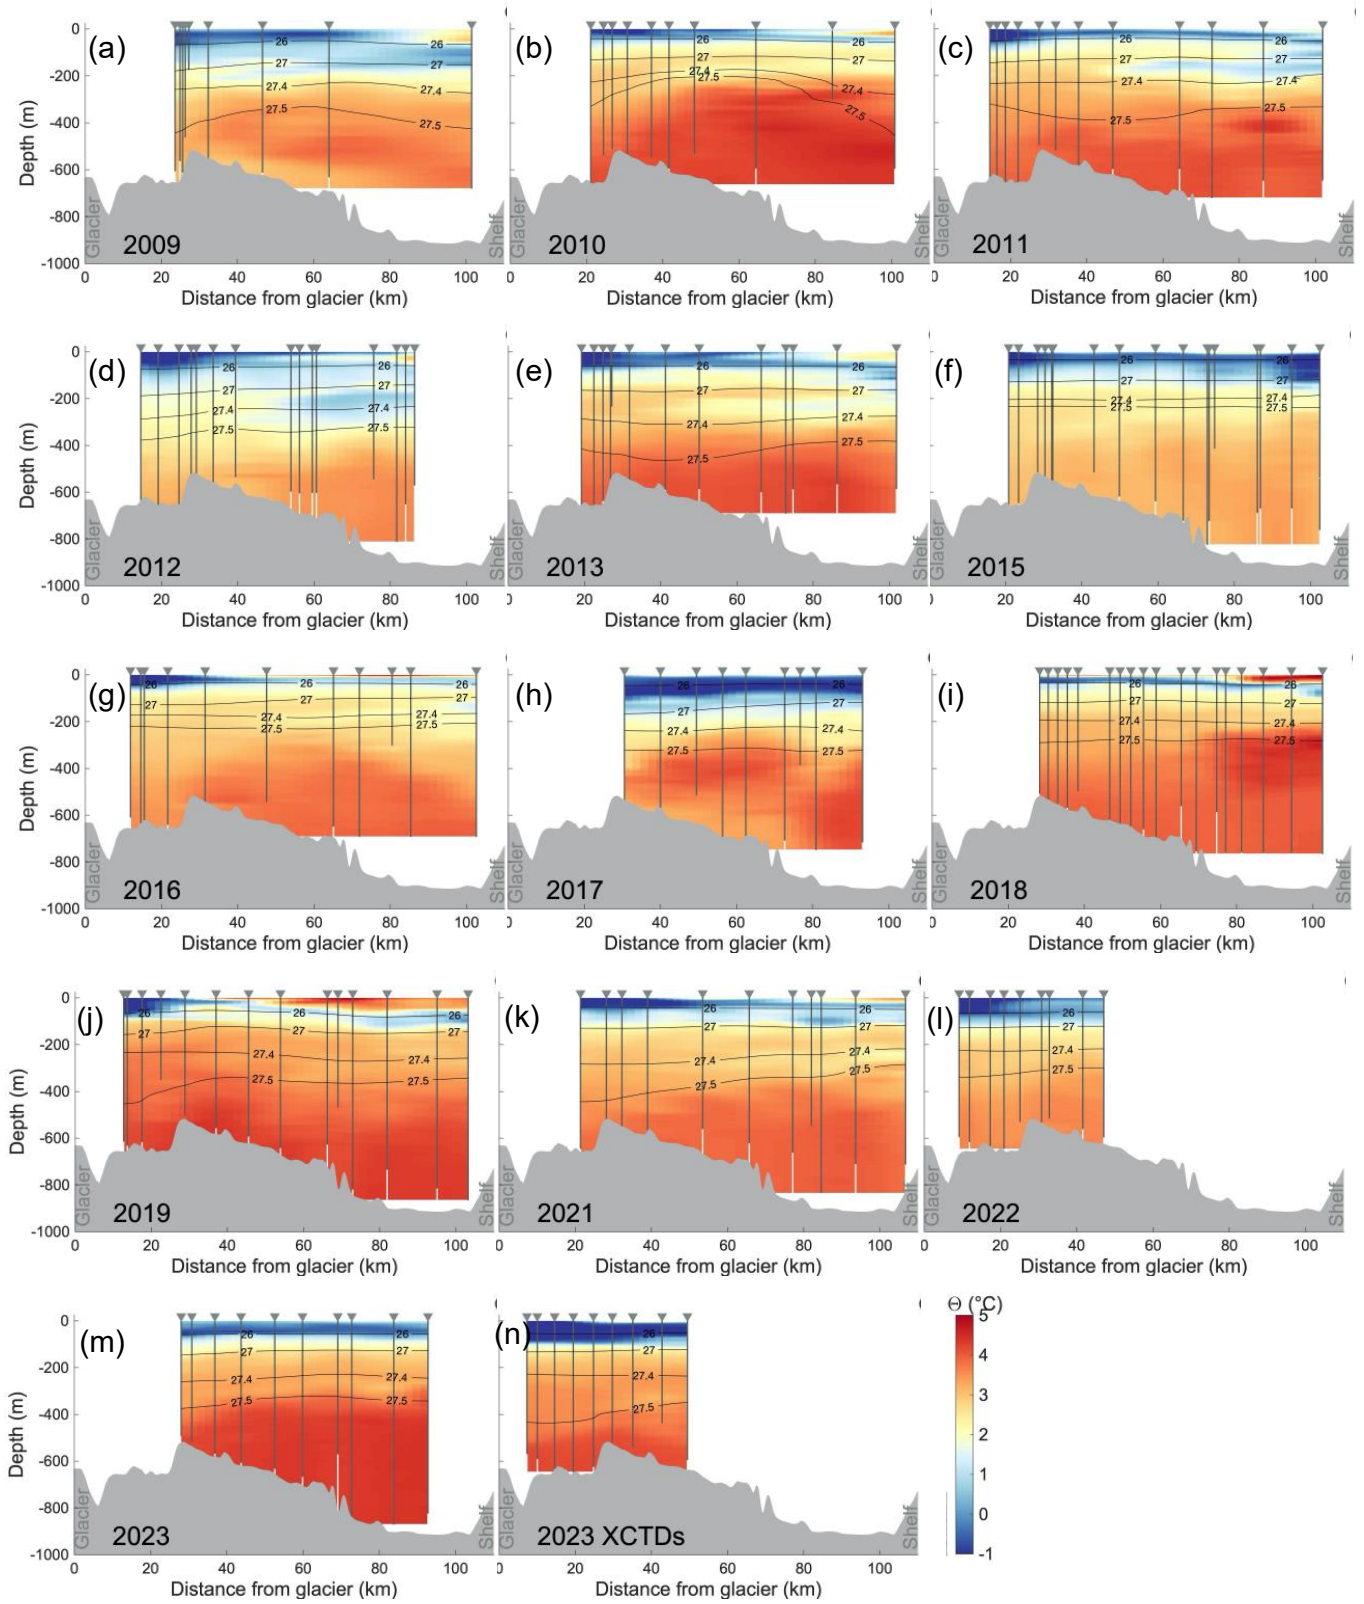

**Figure S1.** The conservative temperature objectively mapped gridded fields for all years with potential density anomaly isopycnals (black contours). Original CTD and XCTD profile locations in the along-fjord direction are shown by triangle markers with vertical black lines representing the depth extent of each profile. White lines show where the bottom of a profile was filled in to facilitate greater data coverage for mapping. The bathymetry (grey area) is derived from a thalweg line (Figure 1) of BedMachine Greenland v4 data (Morlighem et al., 2017). Distance 0 km is the location of the Helheim terminus in 2019.

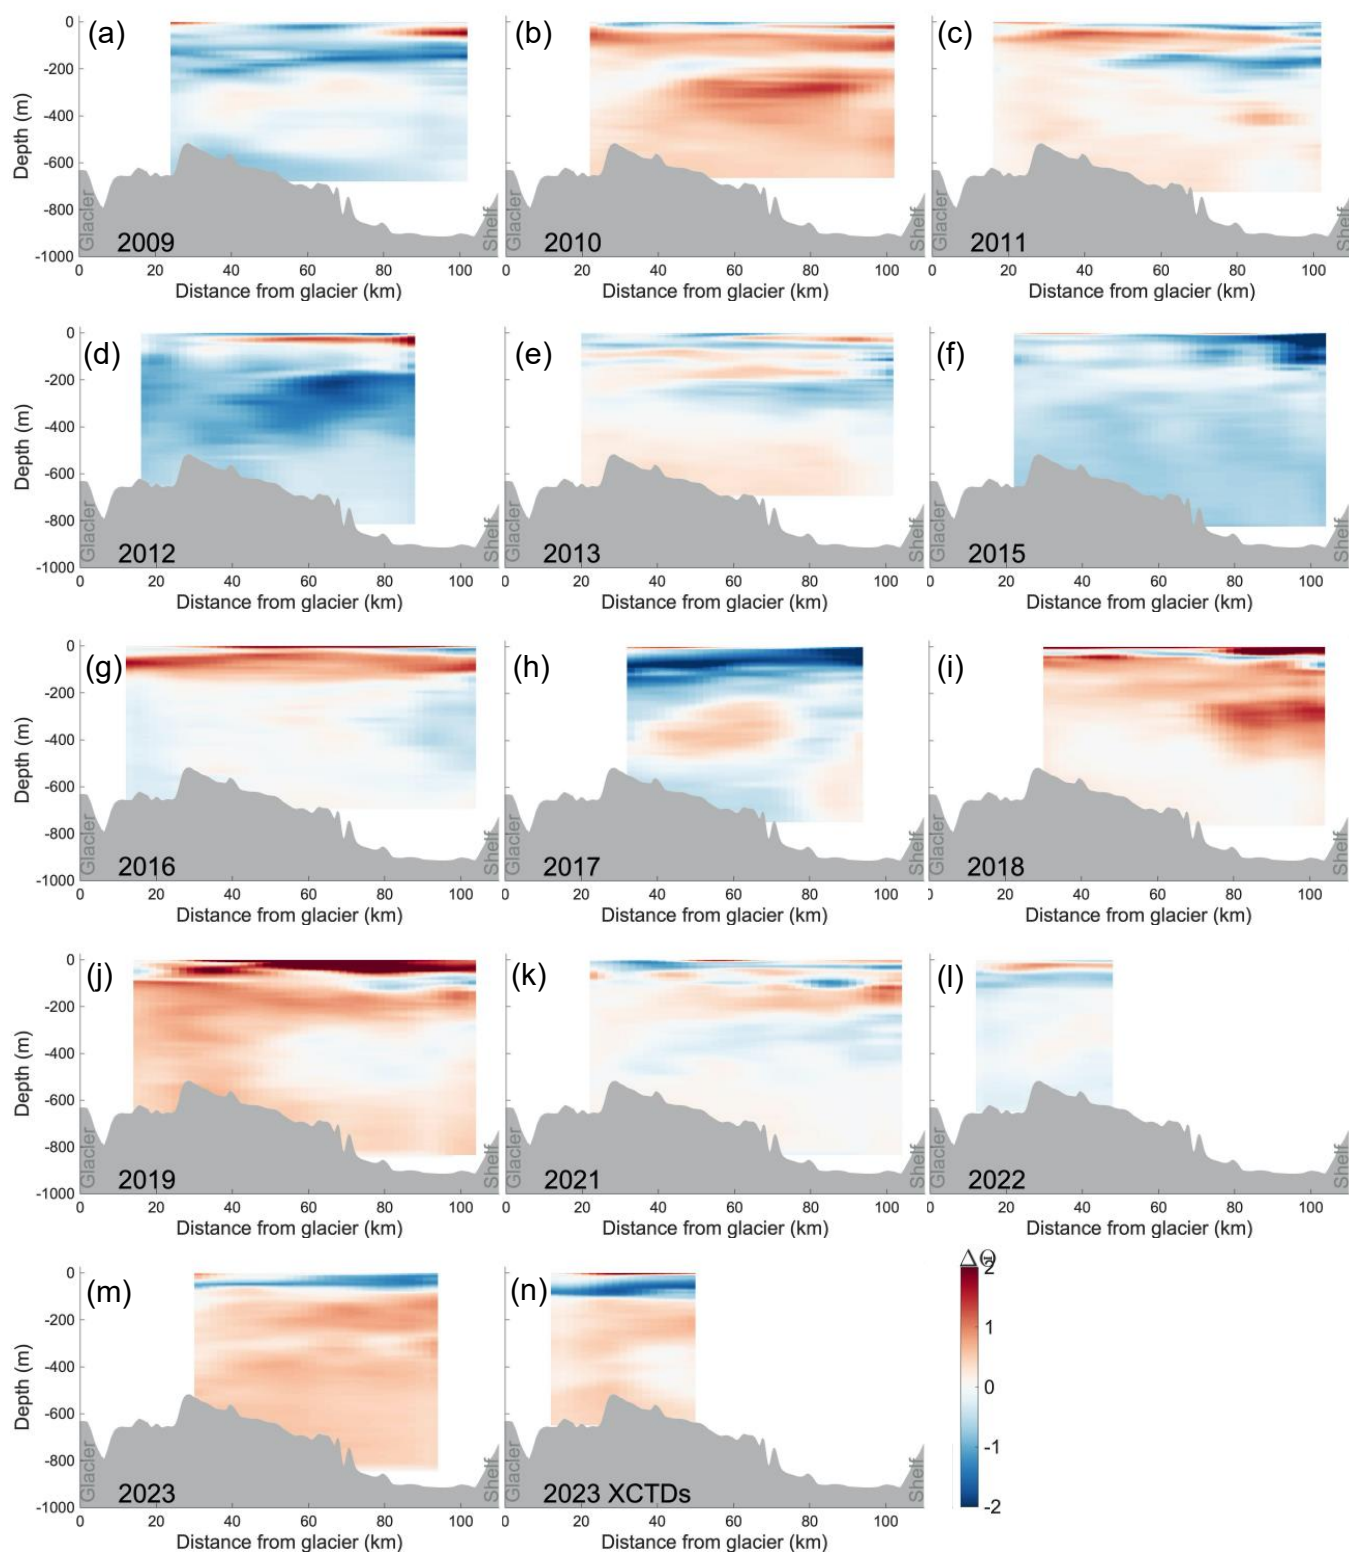

**Figure S2.** Conservative temperature anomalies from the climatological mean for all yearly grids. Cooler (warmer) colors show values less (greater) than the mean for each grid cell.

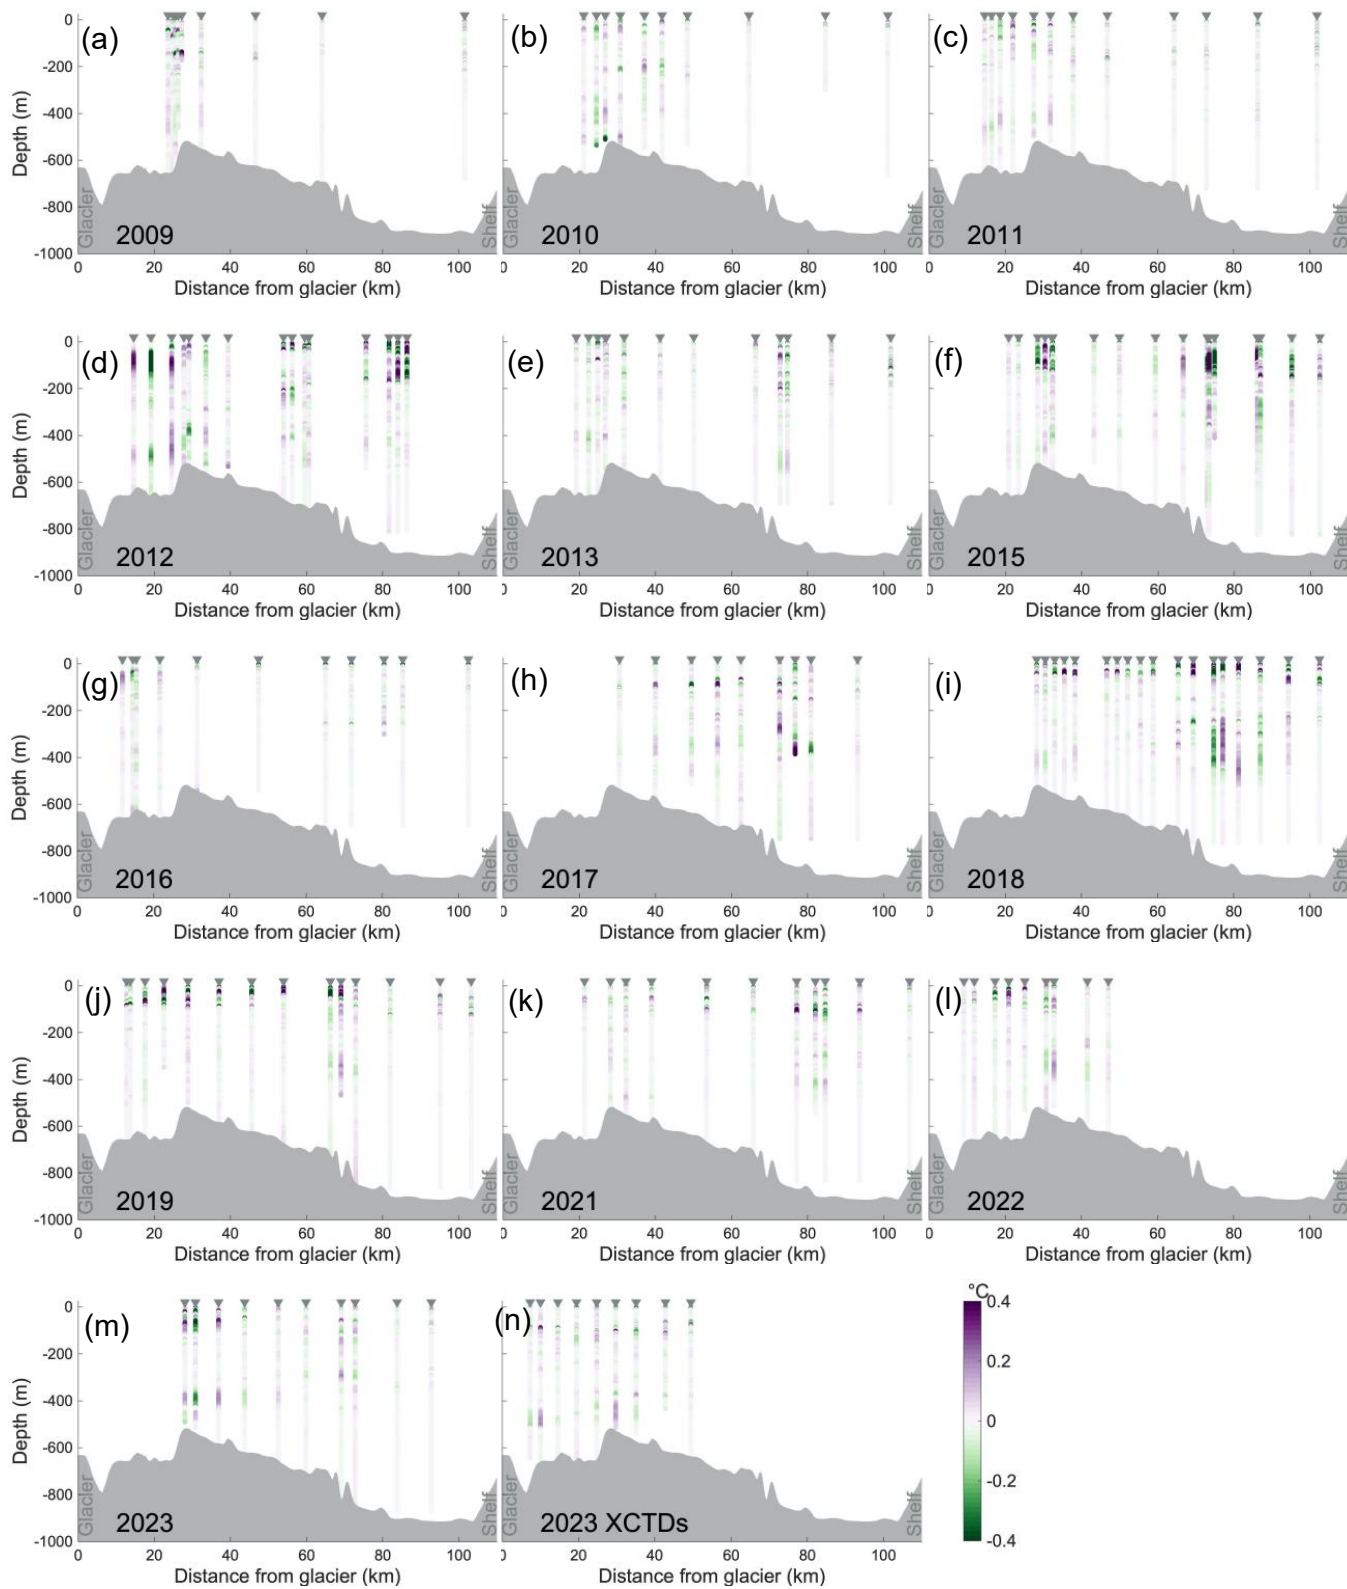

**Figure S3.** Conservative temperature residuals between the profile data and gridded data interpolated to the same position of every data point. Residuals were calculated as profile data minus gridded data values.

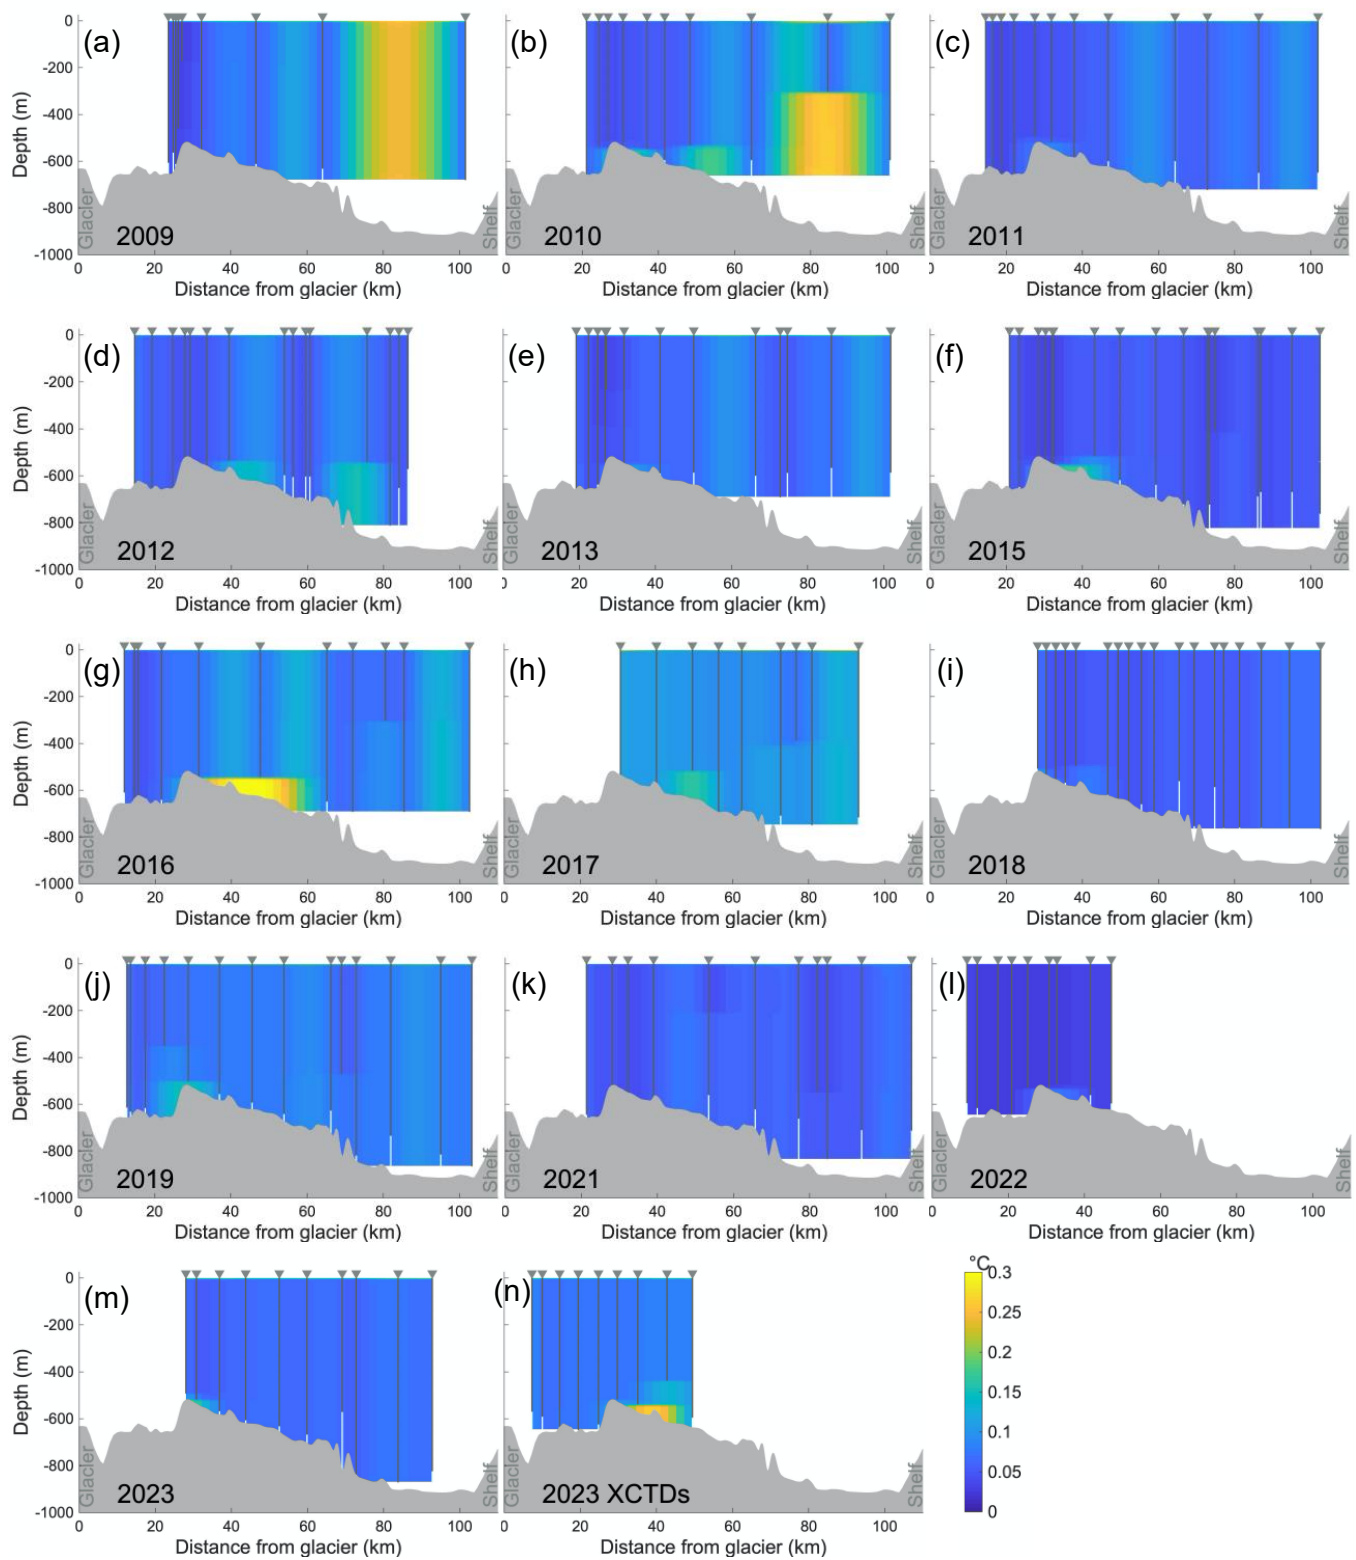

**Figure S4.** Conservative temperature mapping relative error. Original CTD and XCTD profile locations in the along-fjord direction are shown by triangle markers with vertical black lines representing the depth extent of each profile. White lines show where the bottom of a profile was filled in to facilitate greater data coverage for mapping.



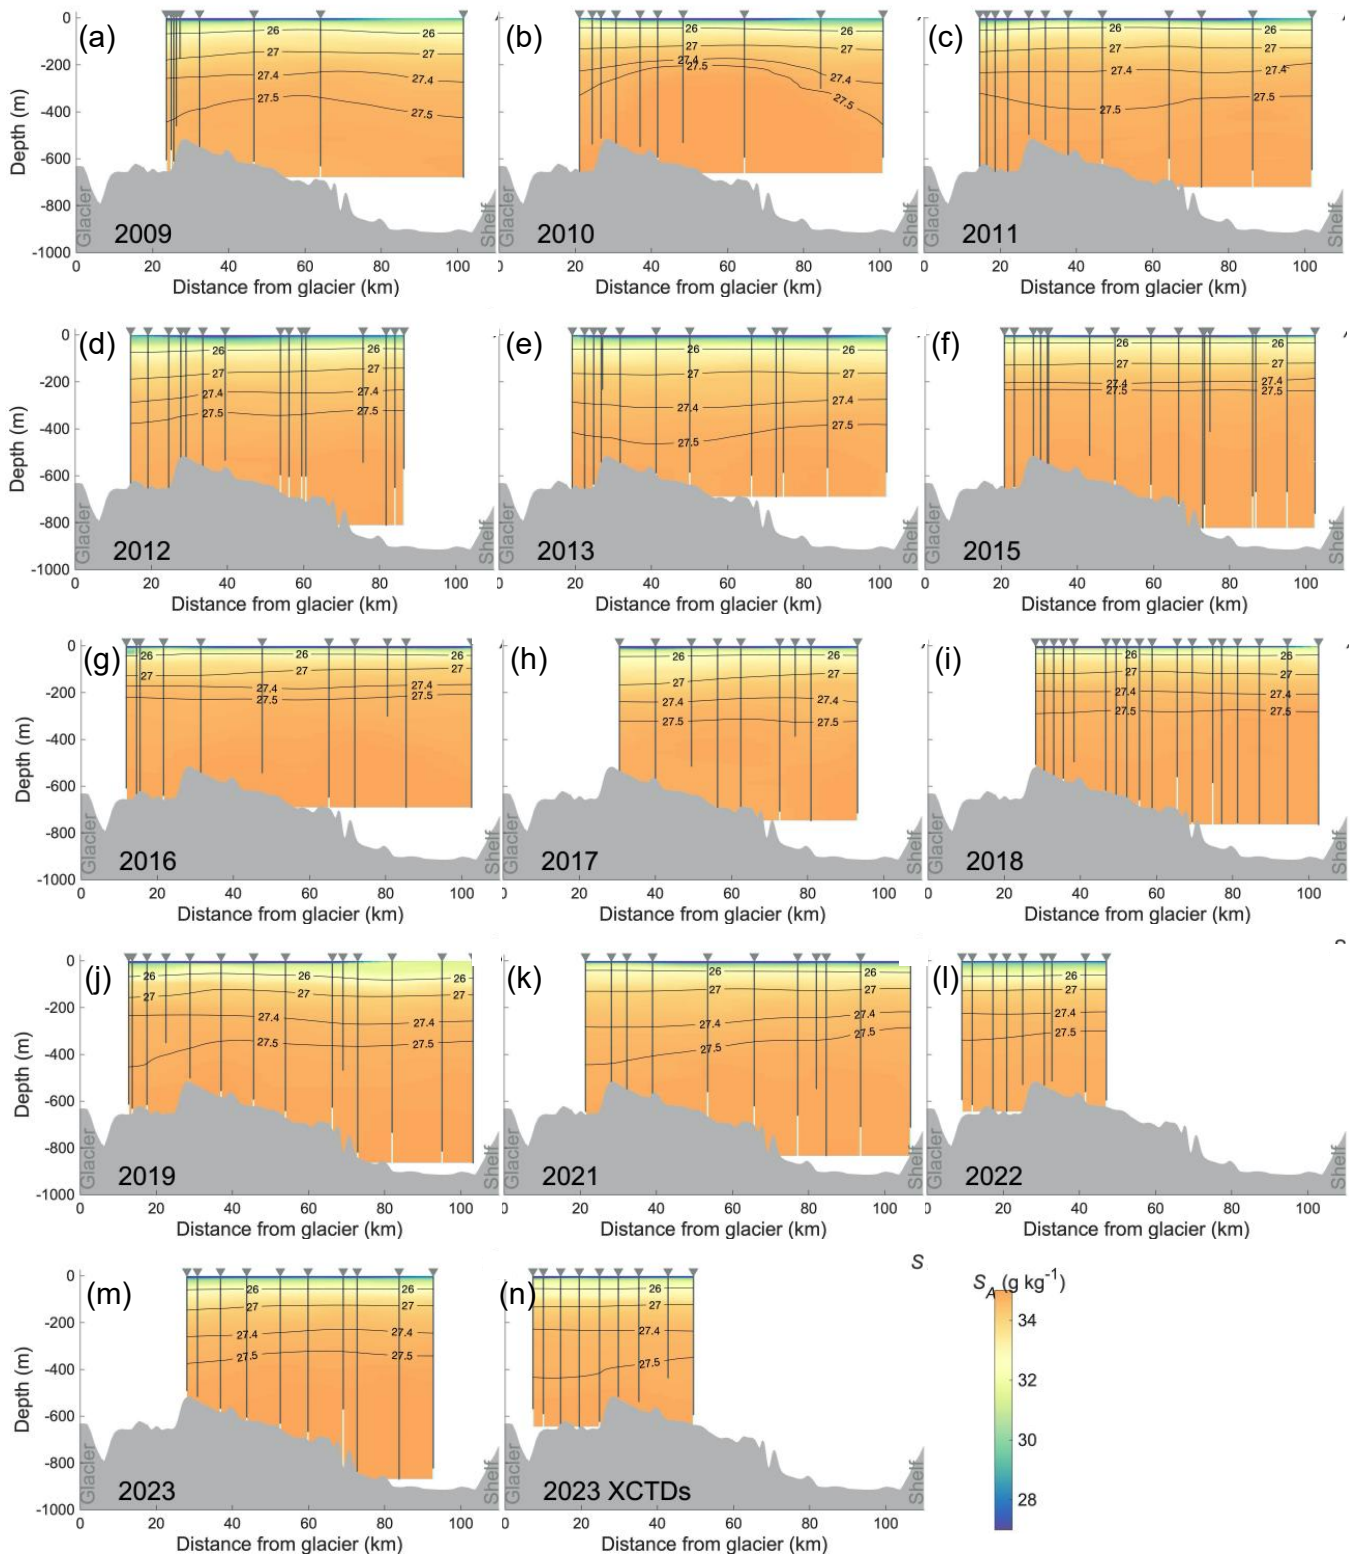

**Figure S5.** The absolute salinity objectively mapped gridded fields for all years with potential density anomaly isopycnals (black contours). Original CTD and XCTD profile locations in the along-fjord direction are shown by triangle markers with vertical black lines representing the depth extent of each profile. White lines show where the bottom of a profile was filled in to facilitate greater data coverage for mapping. The bathymetry (grey area) is derived from a thalweg line (Figure 1) of BedMachine Greenland v4 data (Morlighem et al., 2017). Distance 0 km is the location of the Helheim terminus in 2019.

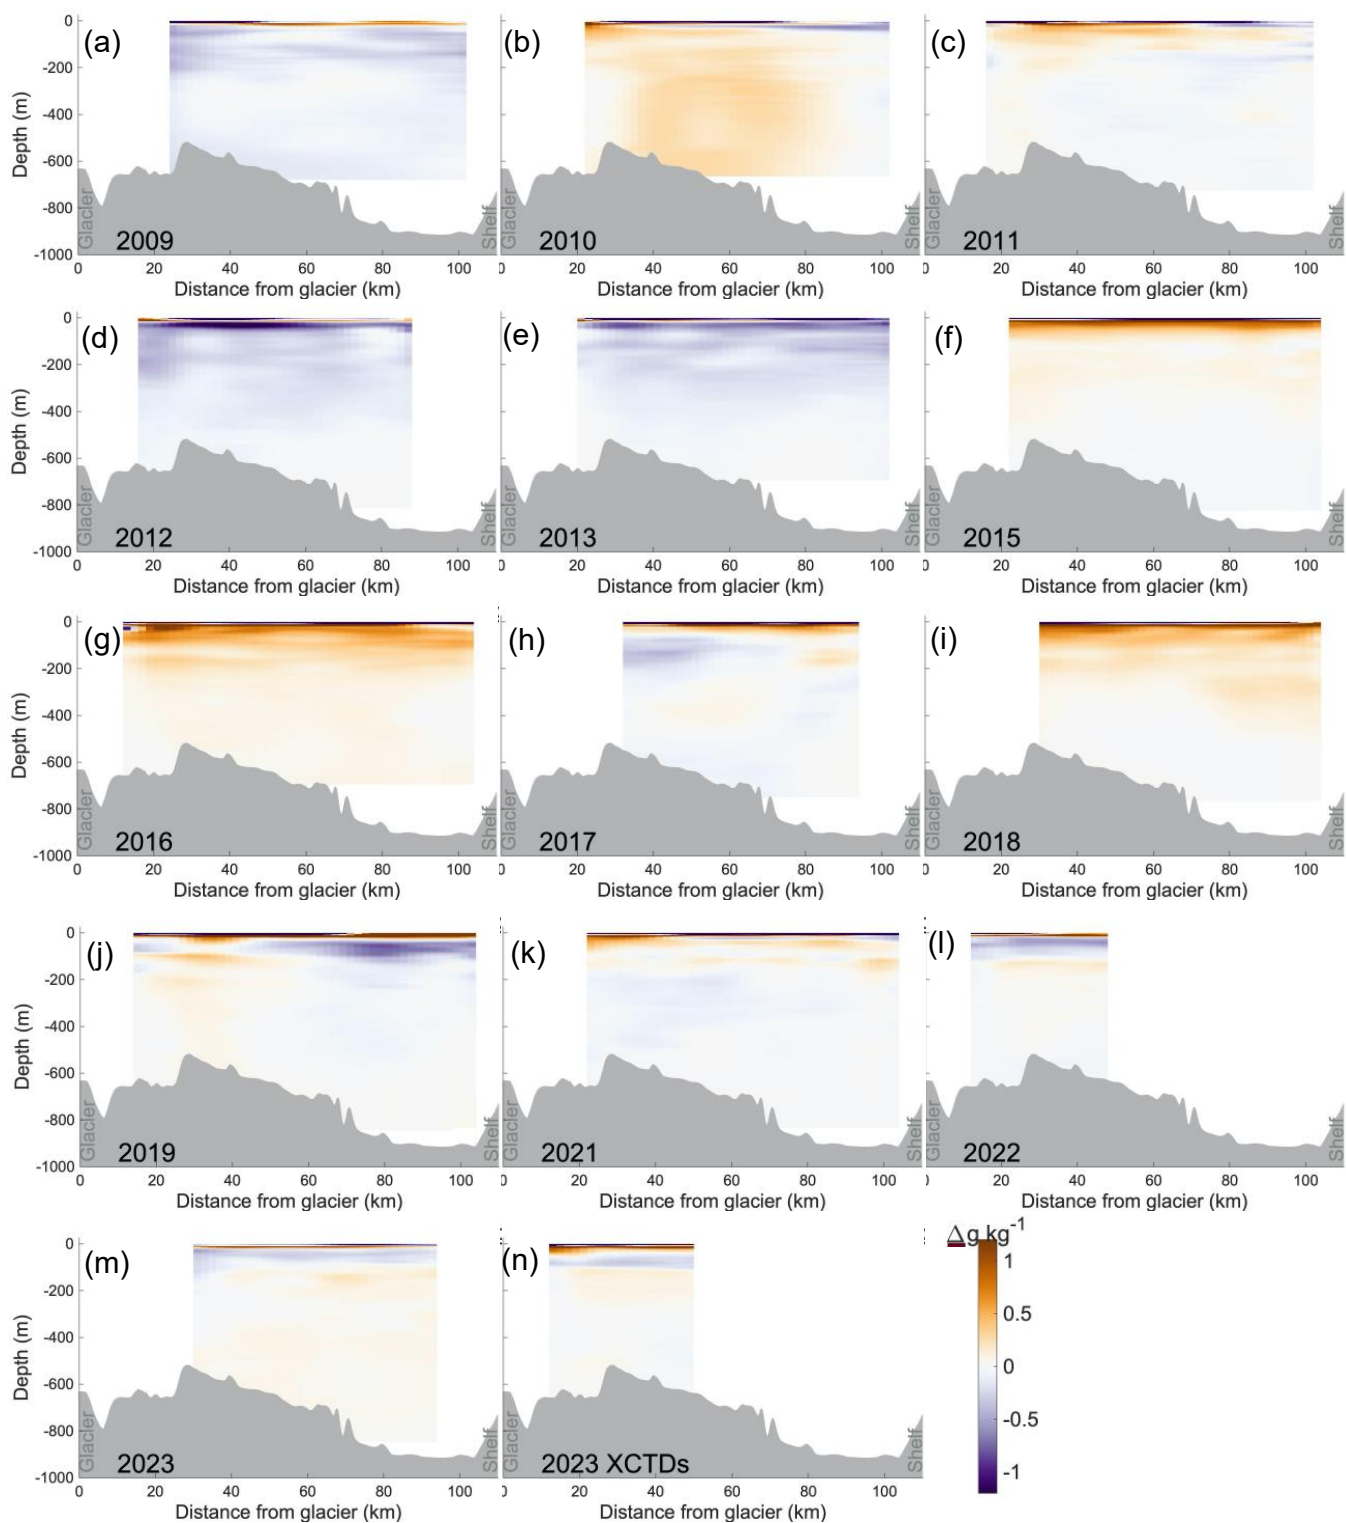

**Figure S6.** Absolute salinity anomalies from the climatological mean for all yearly grids. Warmer (cooler) colors show values greater (less) than the mean for each grid cell.

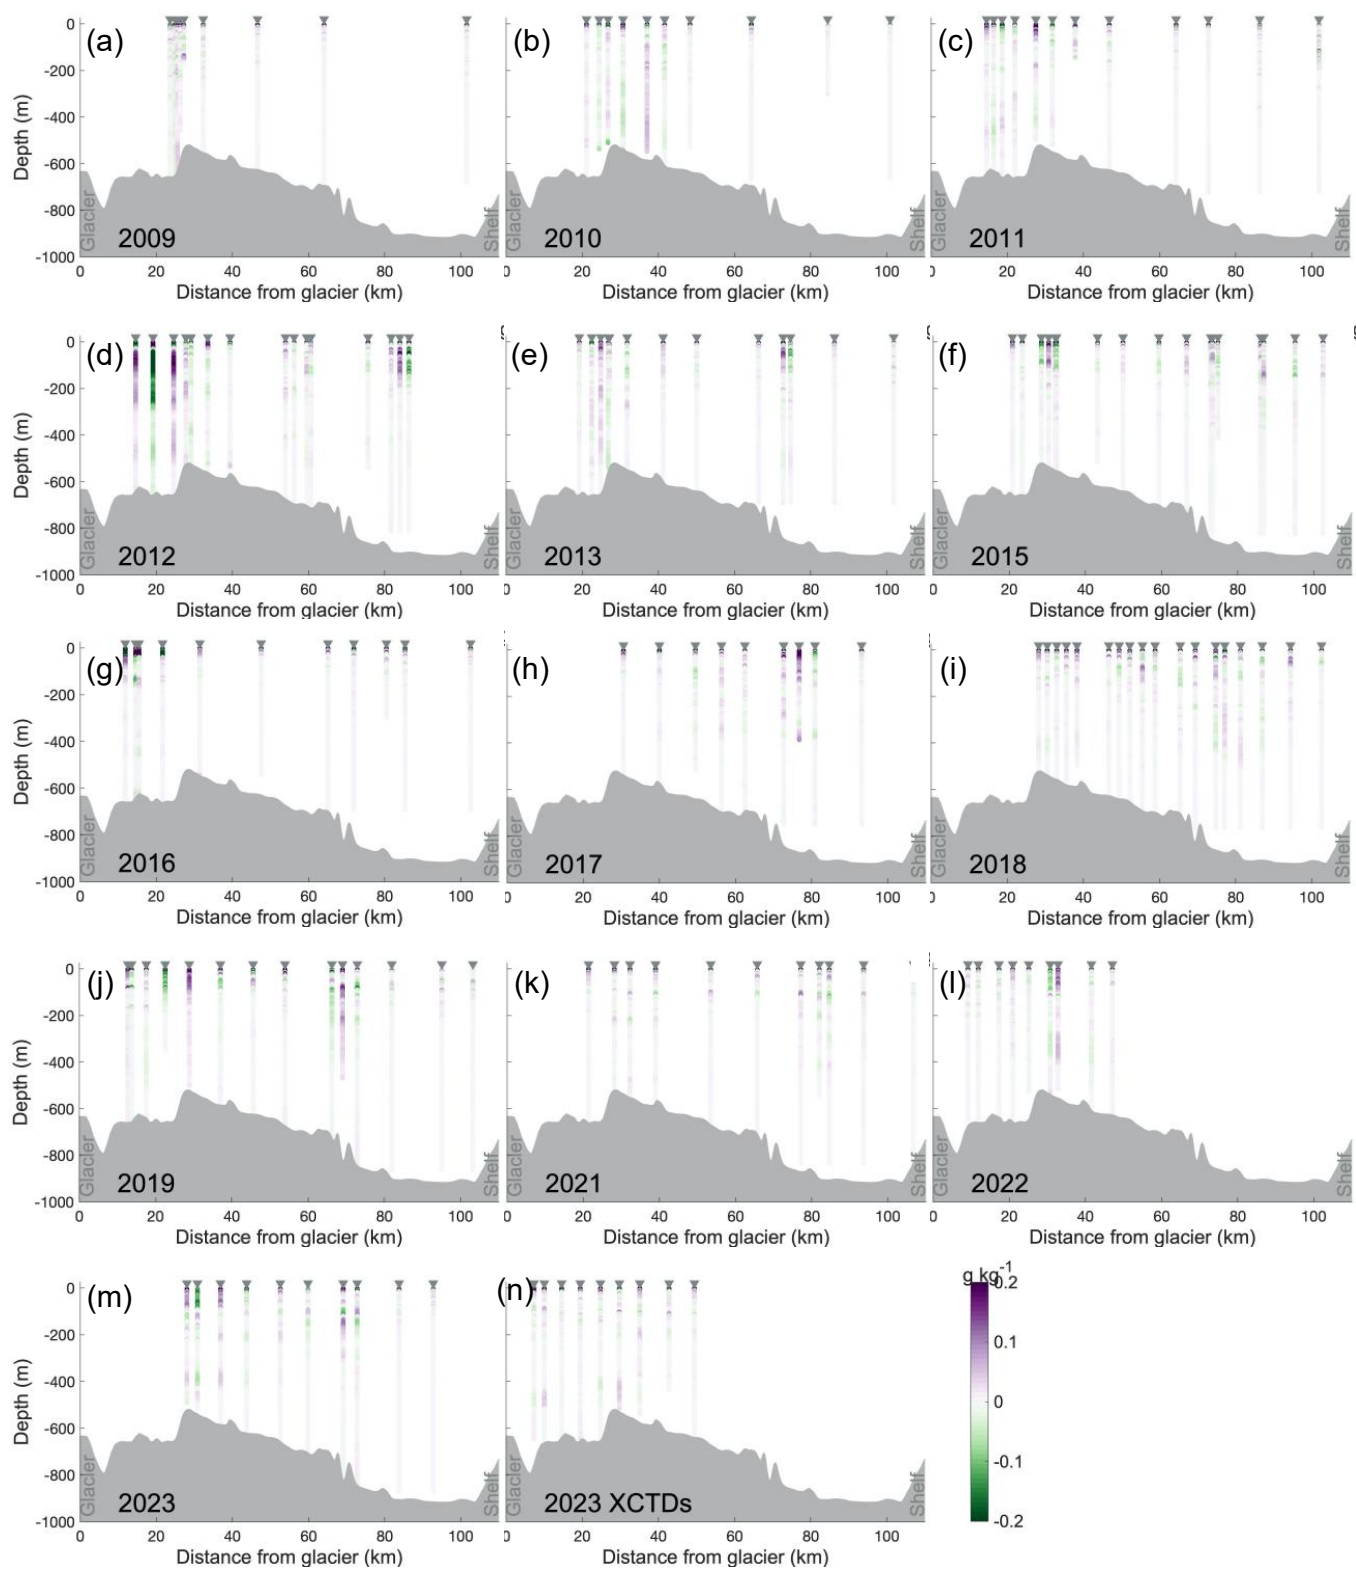

**Figure S7.** Absolute salinity residuals between the profile data and gridded data interpolated to the same position of every data point. Residuals were calculated as profile data minus gridded data values.

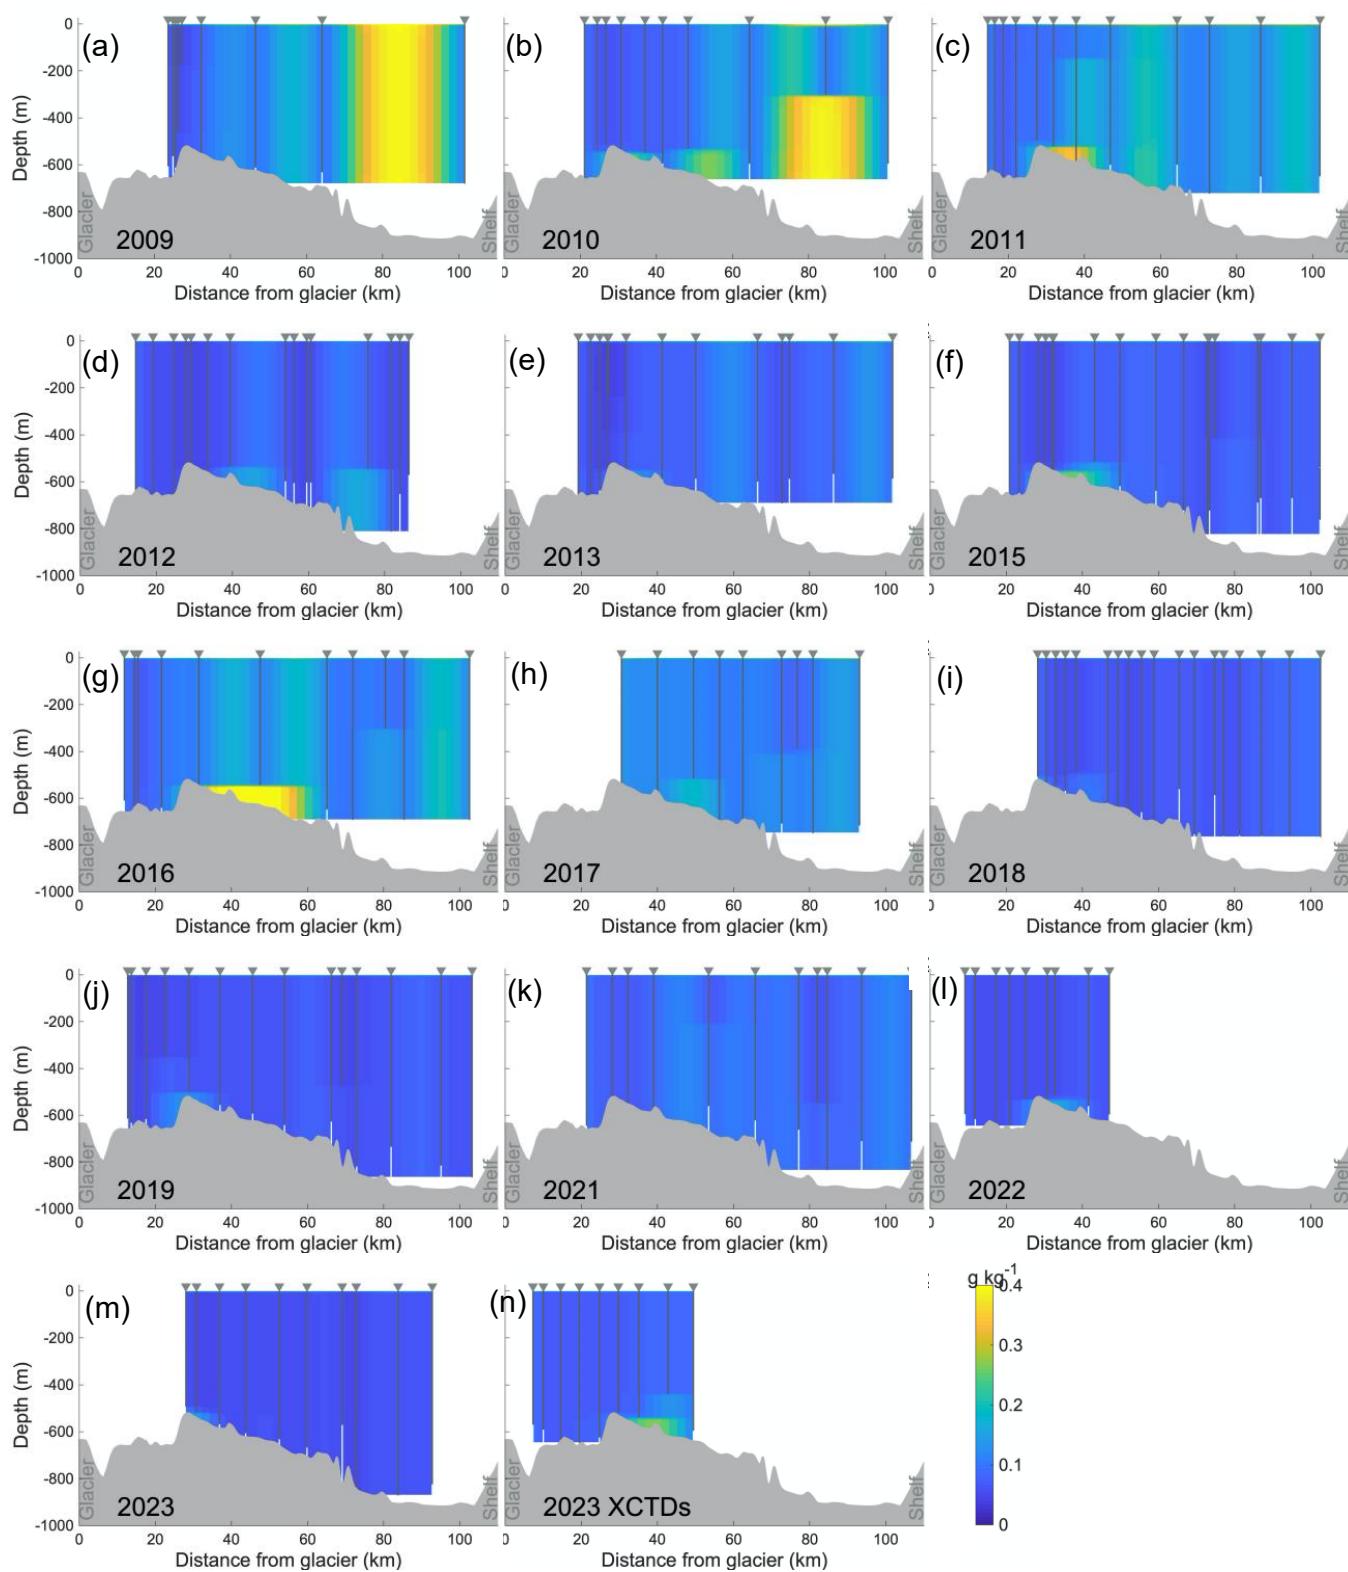

**Figure S8.** Conservative temperature mapping relative error. Original CTD and XCTD profile locations in the along-fjord direction are shown by triangle markers with vertical black lines representing the depth extent of each profile. White lines show where the bottom of a profile was filled in to facilitate greater data coverage for mapping.
